# Supplementary material for: sNucConv: A bulk RNA-seq deconvolution method trained on single-nucleus RNA-seq data to estimate cell-type composition of human adipose tissues
Source: PubMed Central journal article supplement — iScience. 2024 Jun 24;27(7):110368. doi: 10.1016/j.isci.2024.110368 (PMC11277759; doi:10.1016/j.isci.2024.110368), 2024-06-24
Supplement: mmc1.pdf [file mmc1.pdf]

**Supplemental information**

**sNucConv: A bulk RNA-seq deconvolution method  
trained on single-nucleus RNA-seq data to estimate  
cell-type composition of human adipose tissues**

**Gil Sorek, Yulia Haim, Vered Chalifa-Caspi, Or Lazarescu, Maya Ziv-Agam, Tobias Hagemann, Pamela Arielle Nono Nankam, Matthias Blüher, Idit F. Liberty, Oleg Dukhno, Ivan Kukeev, Esti Yeger-Lotem, Assaf Rudich, and Liron Levin**

Figure S1. Initial hVAT sample set snRNA-seq analysis, Related to Figure 2B,D

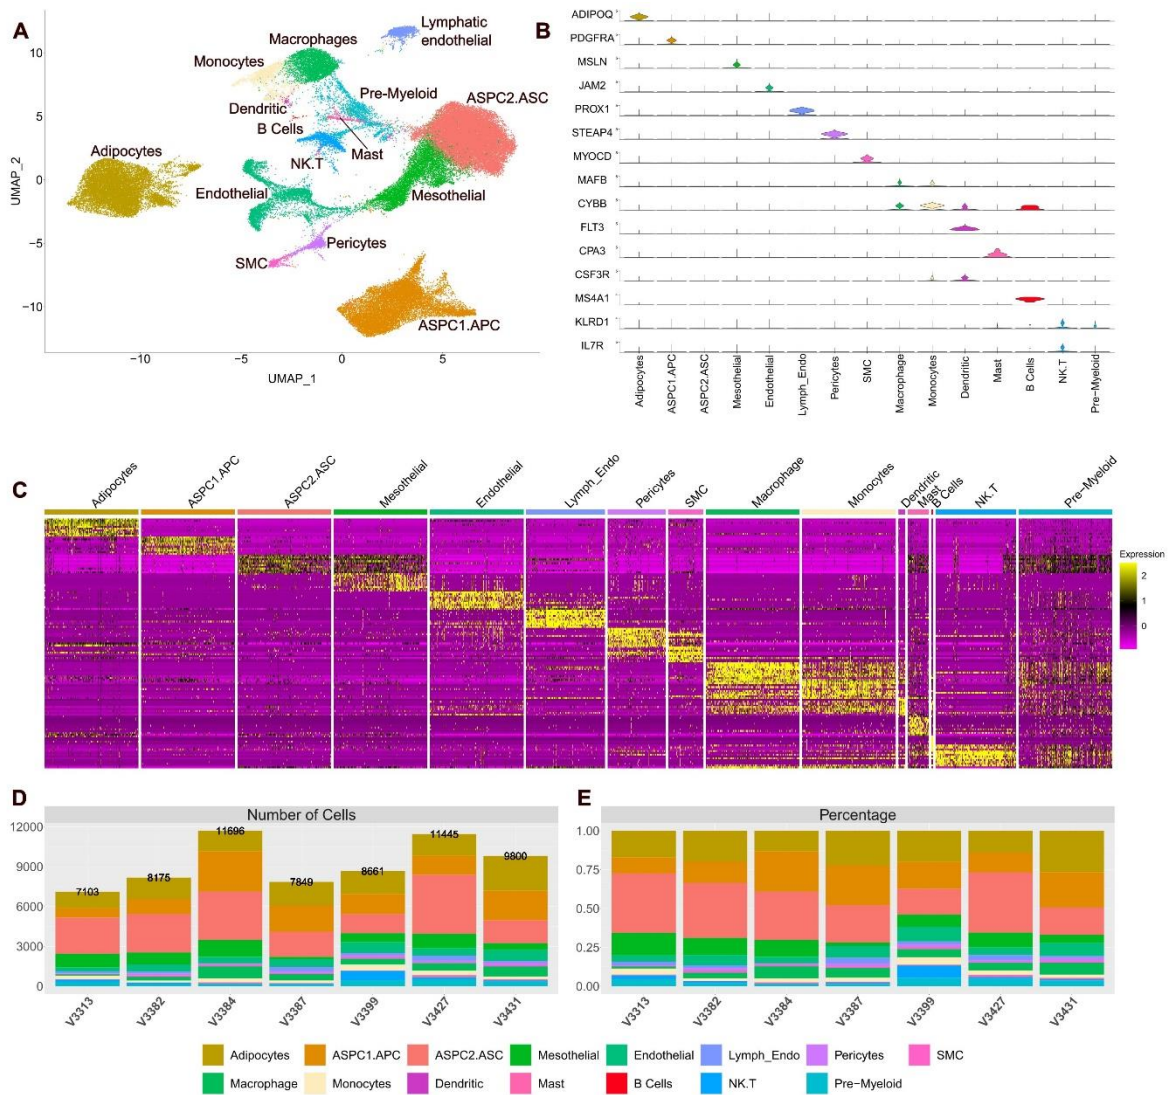

Figure S1: snRNA-seq of hVAT (initial sample set, n=7 samples, 64,729 nuclei)

UMAP (A) and violin plot (B) of single gene cell-type specific markers to identify 15 different cell-types in hVAT. C. Heatmap of displaying 10 preferentially expressed genes in each of the clusters (compared to all other nuclei). Nuclei numbers (D) and proportions (percentage, E) in each cluster per sample.

ASPC1.APC – Adipose stem and progenitor cells 1. Adipocyte progenitor cells; ASPC2.ASC - Adipose stem and progenitor cells 1. Adipose-derived stem cells; SMC – smooth muscle cells.

Figure S2. Initial hSAT sample set snRNA-seq analysis, Related to Figure 2C,E

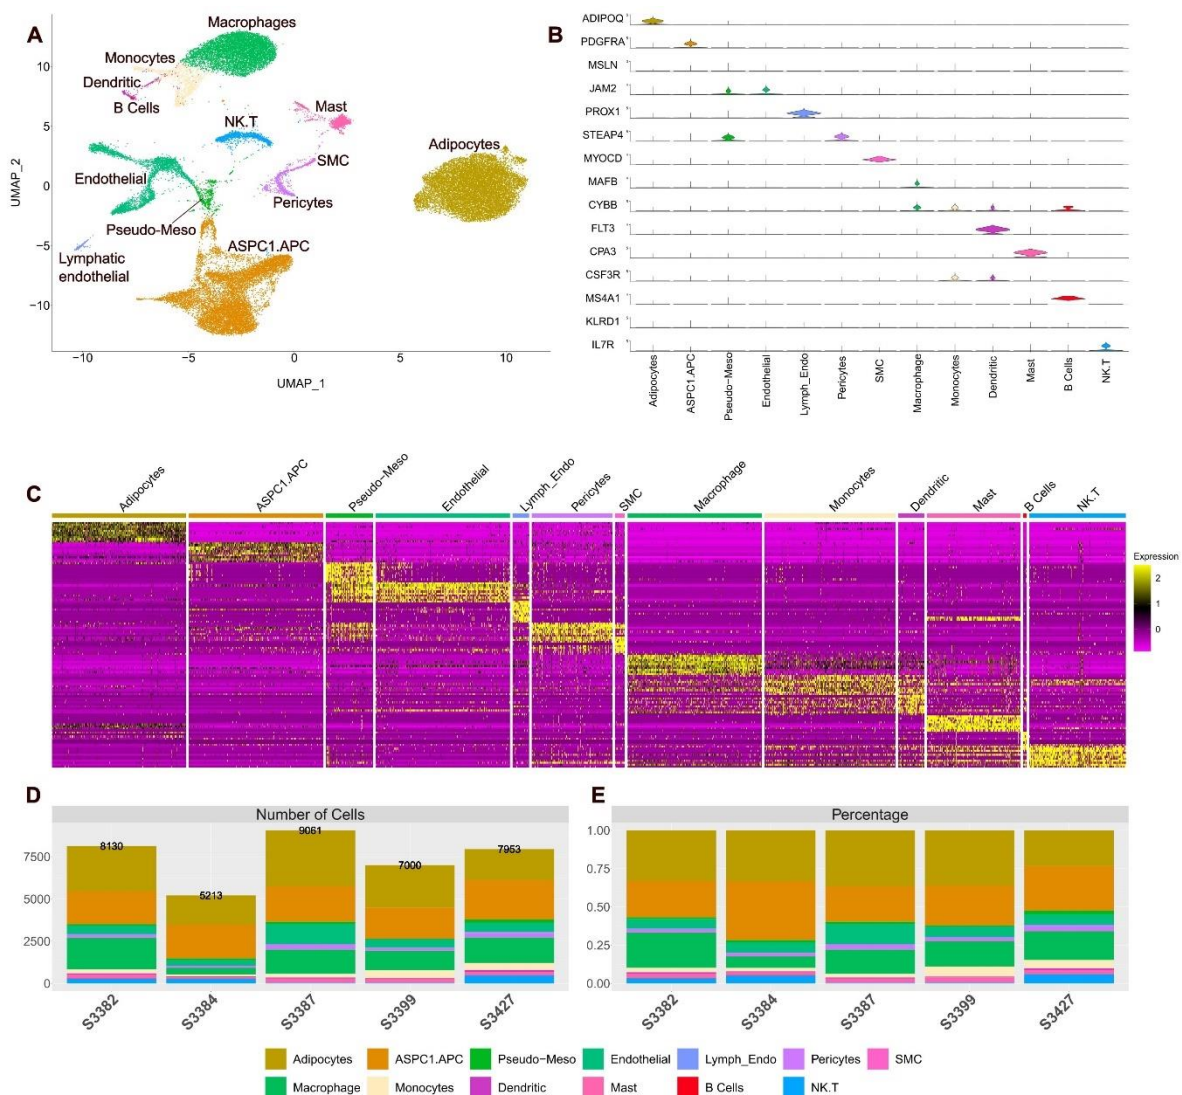

Figure S2: snRNA-seq of hSAT (initial sample set, n=5 samples, 37,357 nuclei)

UMAP (A) and violin plot (B) of single gene cell-type specific markers to identify 13 different cell-types in hSAT. C. Heatmap of displaying 10 preferentially expressed genes in each of the clusters (compared to all other nuclei). Nuclei numbers (D) and proportions (percentage, E) in each cluster per sample.

ASPC1.APC – Adipose stem and progenitor cells 1. Adipocyte progenitor cells; Adipose-derived stem cells; SMC – smooth muscle cells.

Figure S3. sNucConv performance, Related to Figure 4E,F

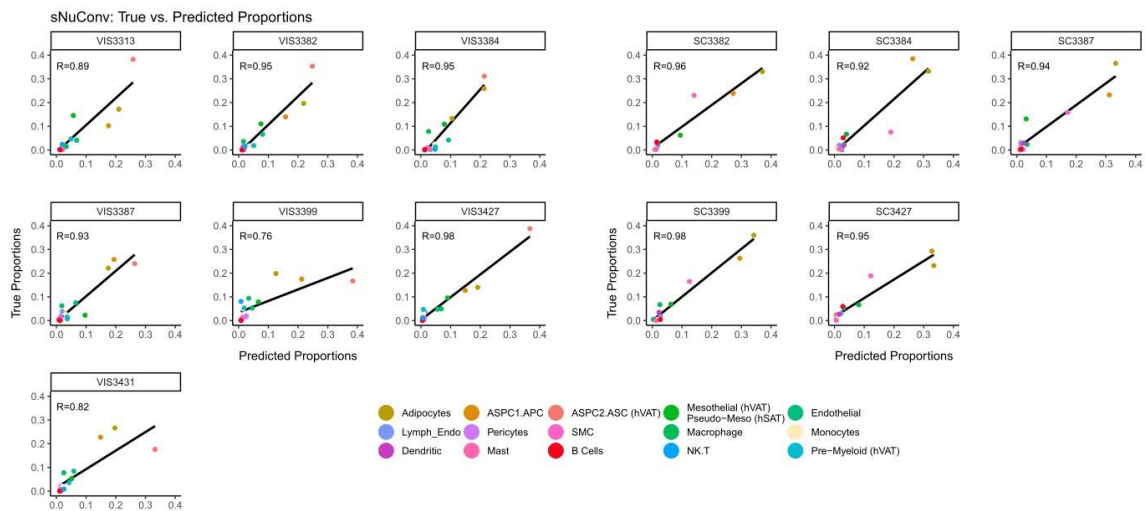

**Figure S3: sNucConv estimated versus True (snRNA-seq -derived) cell-type proportion correlations: initial sample set (7 hVAT, 5 hSAT)**

Graphs are scatter plots of correlations between sNucConv-estimated (applied unto bulk RNA-seq) versus the snRNA-seq -derived true cell-type proportions. Each graph represents the respective 15 and 13 cell types (in hVAT and hSAT) in each of the 12 initial sample set, using a leave-one-out approach.

Figure S4. sNucConv rarefaction analysis, Related to Figure 4E,F

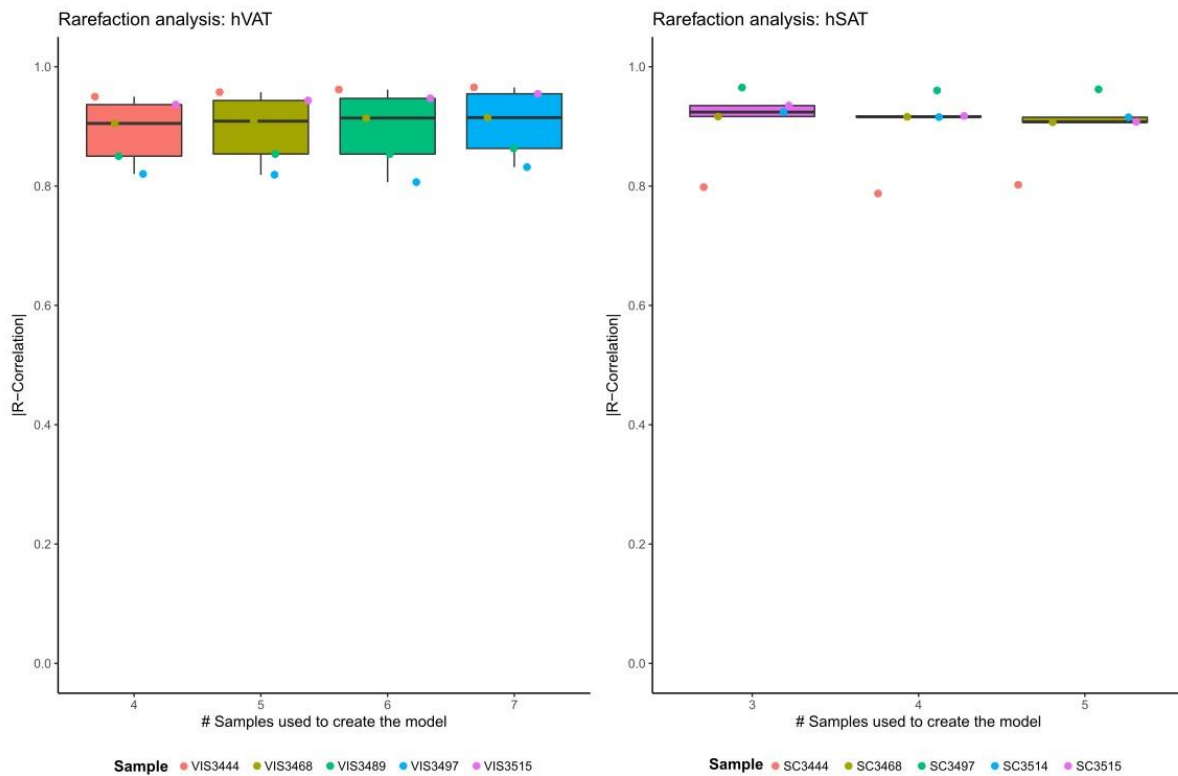

**Figure S4: Rarefaction analysis of sNucConv trained on different number of samples from the initial sample set and assessed on the independent validation sample set.**

sNucSeq was trained on 4,5,6 or 7 of the 7 hVAT initial sample set, or on 3,4 or 5 of the 5 hSAT (all possible combinations when not using all samples for training), and applied onto an independent sample set (validation sample set, 5 hVAT and 5 hSAT). Each point represent the mean R of correlation between the sNucConv-estimated and snRNA-seq -derived true cell-type proportions of all possible training models, per sample.

Figure S5. Doublets identification analysis, Related to method details “Integration and clustering”

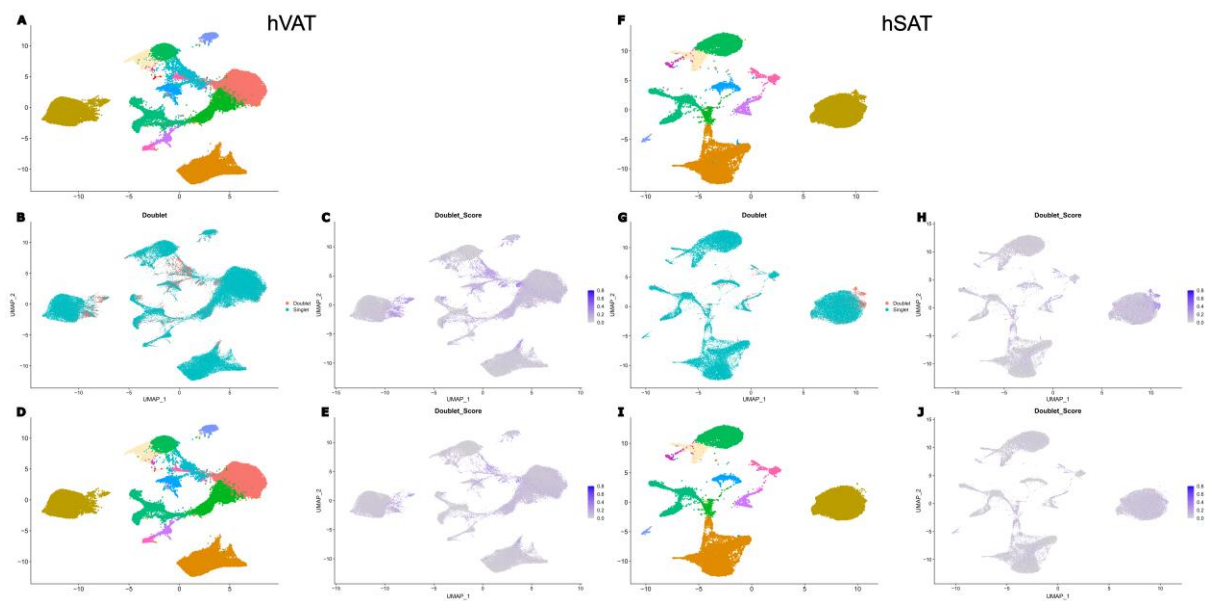

**Figure S5: Secondary putative doublets identification analysis using Scrublet.**

Five (5) UMAP panels are provided for each adipose tissue type (hVAT and hSAT). UMAPs showing clusters and cell-type annotations after DoubletFinder-based removal of putative doublets in hVAT and hSAT (**A., F., respectively**). UMAPs showing binary doublet/singlet identification as identified by Scrublet in hVAT and hSAT (**B., G., respectively**), and the respective UMAPs with doublet score of the entire nuclei as calculated by Scrublet in hVAT and hSAT (**C., H., respectively**). UMAPs showing clusters and cell-type annotations after DoubletFinder-based and additionally Scrublet-based removal of putative doublets in hVAT and hSAT (**D., I., respectively**), and the respective UMAPs with doublet score of the entire nuclei as calculated by Scrublet in hVAT and hSAT (**E., J., respectively**).

Table S1-A. Clinical and Biochemical Characteristics (N=7) – donors of the initial sample set, Related to experimental model and study participants details

|                                              | <b>3313</b> | <b>3382</b> | <b>3384</b> | <b>3387</b> | <b>3399</b> | <b>3427</b> | <b>3431</b> | <b>Mean<br/>(min-max)</b>     |
|----------------------------------------------|-------------|-------------|-------------|-------------|-------------|-------------|-------------|-------------------------------|
| Age (y)                                      | 39          | 42          | 34          | 34          | 33          | 24          | 49          | <b>36.4</b><br>(24.0-49.0)    |
| Sex (male / female)                          | male        | female      | male        | female      | female      | male        | female      | <b>3 / 4</b>                  |
| Body mass index<br>(BMI, kg/m <sup>2</sup> ) | 46.0        | 41.0        | 34.5        | 40.9        | 36.2        | 44.1        | 35.7        | <b>39.8</b><br>(34.5-46.0)    |
| Diastolic blood pressure<br>(mm Hg)          | 79.0        | 87.0        | 61.0        | 80.0        | 88.0        | 95.0        | 70.0        | <b>80.0</b><br>(61.0-95.0)    |
| Systolic blood pressure<br>(mm Hg)           | 130.0       | 123.0       | 116.0       | 117.0       | 133.0       | 132.0       | 128.0       | <b>125.6</b><br>(116.0-133.0) |
| Triglycerides (mg/dL)                        | 114.0       | 131.0       | 181.0       | 69.0        | 179.0       | 65.0        | 195.0       | <b>133.4</b><br>(65.0-195.0)  |
| Total cholesterol (mg/dL)                    | 101.0       | 121.0       | 133.0       | 154.0       | 64.0        | 168.0       | 143.0       | <b>126.3</b><br>(64.0-168.0)  |
| Low-density lipoproteins<br>(LDL, mg/dL)     | 56.0        | 89.0        | 119.0       | 99.0        | 28.0        | 102.0       | 56.0        | <b>78.4</b><br>(28-119)       |
| High-density lipoproteins<br>(HDL, mg/dL)    | 38.0        |             | 48.0        | 42.0        | 38.0        | 54.0        | 48.0        | <b>44.7</b><br>(38.0-54.0)    |
| Fasting plasma glucose<br>(FPG, mg/dL)       | 124.0       | 86.0        | 78.0        | 103.0       | 135.0       | 90.0        | 106.0       | <b>103.1</b><br>(78.0-135.0)  |
| Hemoglobin A1c<br>(HbA1c, %)                 | 5.4         | 5.4         | 5.5         | 5.8         | 6.2         | 5.8         | 6.7         | <b>5.8</b><br>(5.4-6.7)       |
| C-reactive protein<br>(CRP)                  | 1.47        | 0.46        | 0.64        | 0.97        | 0.38        | 0.45        | 0.90        | <b>0.75</b><br>(0.38-1.47)    |

Table S1-B. Clinical and Biochemical Characteristics (N=6) – donors of the validation sample set, Related to experimental model and study participants details

|                                                       | <b>3444</b> | <b>3468</b> | <b>3489</b> | <b>3497</b> | <b>3514</b> | <b>3515</b> | <b>Mean<br/>(min-max)</b>     |
|-------------------------------------------------------|-------------|-------------|-------------|-------------|-------------|-------------|-------------------------------|
| Age (y)                                               | 31          | 25          | 24          | 55          | 30          | 30          | <b>32.5</b><br>(24.0-55.0)    |
| Sex (male / female)                                   | female      | female      | female      | male        | female      | female      | <b>1 / 5</b>                  |
| Body mass index<br>(BMI, kg/m <sup>2</sup> )          | 49.0        | 35.8        | 55.0        | 52.0        | 48.0        | 47.0        | <b>47.8</b><br>(35.8-55.0)    |
| Diastolic blood pressure<br>(mm Hg)                   | 73.0        | 92.0        | 90.0        | 85.0        | 82.0        | 84.0        | <b>84.4</b><br>(73.0-92.0)    |
| Systolic blood pressure<br>(mm Hg)                    | 123.0       | 124.0       | 135.0       | 147.0       | 113.0       | 119.0       | <b>126.8</b><br>(113.0-147.0) |
| Triglycerides (mg/dL)                                 | 88.0        | 173.0       | 144.0       | 152.0       | 159.0       | 115.0       | <b>138.5</b><br>(88.0-173.0)  |
| Total cholesterol (mg/dL)                             | 118.0       | 165.0       | 119.0       | 156.0       | 196.0       | 145.0       | <b>149.8</b><br>(119.0-196.0) |
| Low-density lipoproteins<br>(LDL, mg/dL)              | 63.0        | 80.0        | 56.0        | 85.0        | 120.0       | 73.0        | <b>79.5</b><br>(56.0-120.0)   |
| High-density lipoproteins<br>(HDL, mg/dL)             | 37.0        | 50.0        | 35.0        | 40.0        | 44.0        | 49.0        | <b>42.5</b><br>(35.0-50.0)    |
| Fasting plasma glucose<br>(FPG, mg/dL)                | 108.0       | 99.0        | 112.0       | 114.0       | 79.0        | 117.0       | <b>104.8</b><br>(79.0-117.0)  |
| Hemoglobin A <sub>1c</sub><br>(HbA <sub>1c</sub> , %) | 5.7         | 5.6         | 5.8         | 6.4         | 5.7         | 5.6         | <b>5.8</b><br>(5.6-6.4)       |
| C-reactive protein<br>(CRP)                           | 3.05        | 0.50        | 2.75        | 0.39        | 1.61        | 2.06        | <b>1.72</b><br>(0.5-3.05)     |



Table S2-A. Cell Ranger parameters (raw counts, before QC) – Initial sample set, Related to methods details: “Quality control and mapping”

|                | Adipose tissue depot | Estimated number of nuclei | Mean reads per nucleus | Median genes per nucleus | Fraction reads in nuclei | Sequencing saturation |
|----------------|----------------------|----------------------------|------------------------|--------------------------|--------------------------|-----------------------|
| <b>3313</b>    | vis                  | 11,919                     | 26,175                 | 1,841                    | 80.1%                    | 54.7%                 |
| <b>3382</b>    | sc                   | 11,215                     | 54,243                 | 1,960                    | 53.5%                    | 61.4%                 |
|                | vis                  | 9,482                      | 35,831                 | 1,341                    | 60.9%                    | 74.0%                 |
| <b>3384</b>    | sc                   | 6,860                      | 88,421                 | 1,704                    | 50.1%                    | 76.2%                 |
|                | vis                  | 14,595                     | 32,624                 | 2,077                    | 58.6%                    | 32.2%                 |
| <b>3387</b>    | sc                   | 10,059                     | 45,335                 | 2,613                    | 70.1%                    | 48.0%                 |
|                | vis                  | 11,419                     | 45,930                 | 2,299                    | 68.8%                    | 44.1%                 |
| <b>3399</b>    | sc                   | 8,563                      | 41,334                 | 2,154                    | 69.7%                    | 40.5%                 |
|                | vis                  | 11,796                     | 34,034                 | 1,822                    | 68.3%                    | 48.5%                 |
| <b>3427</b>    | sc                   | 9,203                      | 56,577                 | 1,632                    | 60.4%                    | 65.2%                 |
|                | vis                  | 14,605                     | 36,866                 | 1,626                    | 59.2%                    | 56.7%                 |
| <b>3431</b>    | vis                  | 12,043                     | 41,091                 | 1,362                    | 59.5%                    | 70.9%                 |
| <b>Mean</b>    | sc                   | <b>9,180</b>               | <b>57,182</b>          | <b>2,020</b>             | <b>61%</b>               | <b>58%</b>            |
|                | vis                  | <b>12,265</b>              | <b>36,078</b>          | <b>1,766</b>             | <b>65%</b>               | <b>54%</b>            |
| <i>min-max</i> | sc                   | <i>6,860-11,215</i>        | <i>41,334-88,421</i>   | <i>1,632-2,613</i>       | <i>50.1%-70.1%</i>       | <i>40.5%-76.2%</i>    |
|                | vis                  | <i>9,482-14,595</i>        | <i>26,175-45,930</i>   | <i>1,341-2,299</i>       | <i>58.6%-80.1%</i>       | <i>32.2%-74.0%</i>    |

Table S2-B. Cell Ranger parameters (raw counts, before QC) – Validation sample set, Related to methods details: “Quality control and mapping”

|                | <b>Adipose tissue depot</b> | <b>Estimated number of nuclei</b> | <b>Mean reads per nucleus</b> | <b>Median genes per nucleus</b> | <b>Fraction reads in nuclei</b> | <b>Sequencing saturation</b> |
|----------------|-----------------------------|-----------------------------------|-------------------------------|---------------------------------|---------------------------------|------------------------------|
| <b>3444</b>    | sc                          | 9,768                             | 51,632                        | 1,790                           | 62.4%                           | 72.6%                        |
|                | vis                         | 13,012                            | 37,987                        | 1,718                           | 65.0%                           | 70.5%                        |
| <b>3468</b>    | sc                          | 7,343                             | 62,712                        | 1,950                           | 74.3%                           | 58.7%                        |
|                | vis                         | 9,482                             | 50,581                        | 2,178                           | 69.7%                           | 44.6%                        |
| <b>3489</b>    | vis                         | 10,328                            | 46,101                        | 1,604                           | 65.5%                           | 65.1%                        |
| <b>3497</b>    | sc                          | 4,617                             | 75,947                        | 1,671                           | 63.0%                           | 77.7%                        |
|                | vis                         | 6,278                             | 44,343                        | 1,675                           | 66.4%                           | 76.0%                        |
| <b>3514</b>    | sc                          | 9,698                             | 54,851                        | 1,789                           | 70.1%                           | 75.8%                        |
| <b>3515</b>    | sc                          | 9,255                             | 69,244                        | 1,646                           | 60.7%                           | 80.2%                        |
|                | vis                         | 7,479                             | 60,108                        | 1,790                           | 59.7%                           | 78.6%                        |
| <b>Mean</b>    | <b>sc</b>                   | <b>8,136</b>                      | <b>62,877</b>                 | <b>1,769</b>                    | <b>66.1%</b>                    | <b>73.0%</b>                 |
|                | <b>vis</b>                  | <b>9,315</b>                      | <b>46,624</b>                 | <b>1,793</b>                    | <b>65.2%</b>                    | <b>66.9%</b>                 |
| <i>min-max</i> | <i>sc</i>                   | <i>4,617-9,768</i>                | <i>51,632-75,947</i>          | <i>1,646-1,950</i>              | <i>60.7%-74.3%</i>              | <i>58.7%-80.2%</i>           |
|                | <i>vis</i>                  | <i>6,278-13,012</i>               | <i>37,987-60,108</i>          | <i>1,604-2,178</i>              | <i>59.7%-69.7%</i>              | <i>44.6%-78.6%</i>           |

Table S3. Studies developing deconvolution tools, Related to Discussion

| Reference                                        | Title                                                                                                                                                                     | Tissue                                               | scRNA-seq / snRNA-seq      | n                                                                                                                                                                                                                   | # of cells/ nuclei                 | Deconvolution tool | Parallel bulk and sc/sn-RNA seq of same samples?                                                             | Performance assessment approach                                                | Number of cell sub populations                               |
|--------------------------------------------------|---------------------------------------------------------------------------------------------------------------------------------------------------------------------------|------------------------------------------------------|----------------------------|---------------------------------------------------------------------------------------------------------------------------------------------------------------------------------------------------------------------|------------------------------------|--------------------|--------------------------------------------------------------------------------------------------------------|--------------------------------------------------------------------------------|--------------------------------------------------------------|
| Wang X et al., Nature Commu. 2019                | Bulk tissue cell type deconvolution with multi-subject single-cell expression reference                                                                                   | Human pancreatic islets<br>Mouse/rat kidney          | scRNA-seq                  | <i>Human islets datasets:</i><br>n=31 scRNA-seq<br>n=96 bulk-RNA seq<br><i>Mouse/rat kidney datasets:</i><br>n=7 scRNA-seq<br>n=156 bulk-RNA seq                                                                    | 11,430<br><br>43,475               | MuSiC              | No indication<br><br>No indication                                                                           | Performance of MuSiC was compared to BSEQ-sc and CIBERSORT.                    | Human islets: 4<br><br>Mouse/rat kidney: 6                   |
| Menden K et al., Sci. Adv. 2020                  | Deep learning–based cell composition analysis from tissue expression profiles                                                                                             | Human PBMCs<br><br>Human pancreas<br><br>Human brain | scRNA-seq                  | <i>Human PBMCs datasets:</i><br>n=3 scRNA-seq<br>n=24 bulk-RNA seq<br><i>Human pancreas datasets:</i><br>n=14 scRNA-seq<br>n=18 bulk-RNA seq<br><i>Human brain datasets:</i><br>n=2 scRNA-seq<br>n=390 bulk-RNA seq | 26,219<br><br>12,083<br><br>27,881 | Scaden             | No indication<br><br>No indication<br><br>No indication                                                      | Performance of Scaden was compared to CSx, and MuSiC.                          | Human PBMCs: 6<br><br>Human pancreas:4<br><br>Human brain: 7 |
| Dong M et al., Briefings in Bioinformatics. 2021 | SCDC: bulk gene expression deconvolution by multiple single-cell RNA sequencing references                                                                                | Mouse mammary glands                                 | scRNA-seq                  | <i>Mouse mammary gland datasets:</i><br>n=2 scRNA-seq<br>n=2 bulk-RNA seq                                                                                                                                           | Not indicated                      | SCDC               | Yes (n=2)                                                                                                    | Performance of SCDC was compared to CSx, MuSiC, CIBERSORT and BSEQ-sc.         | Mouse mammary glands: 5                                      |
| Jew B et al. Nature Commu. 2020                  | Accurate estimation of cell composition in bulk expression through robust integration of single-cell information                                                          | Human SAT<br><br>Human cortex                        | snRNA-seq<br><br>snRNA-seq | <i>Human SAT datasets:</i><br>n=6 snRNA-seq<br>n=106 bulk-RNA seq<br><i>Human cortex datasets:</i><br>n=8 snRNA-seq<br>n=636 bulk-RNA seq                                                                           | 10,947<br><br>68,028               | Bisque             | Yes (n=6)<br><br>Yes (n=8)                                                                                   | Performance of Bisque was compared to MuSiC, BSEQ-sc and CIBERSORT.            | Human SAT: 5<br><br>Human cortex: 11                         |
| <b>PRESENT STUDY:</b><br>Sorek G et al. iScience | sNucConv: A bulk RNA-seq deconvolution method trained on single-nucleus RNA-seq data to estimate cell-type composition of human subcutaneous and visceral adipose tissues | Human SAT<br><br>Human VAT                           | snRNA-seq<br><br>snRNA-seq | <i>Human SAT datasets:</i><br><b>n=10</b> snRNA-seq<br><b>n=10</b> bulk-RNA seq<br><i>Human VAT datasets:</i><br><b>n=12</b> snRNA-seq<br><b>n=12</b> bulk-RNA seq                                                  | 86,581<br><br>132,438              | sNucConv           | Yes (n=10)<br>(5 “initial” set + 5 validation set)<br><br>Yes (n=12)<br>(7 “initial” set + 5 validation set) | Performance of sNucConv was compared to MuSiC, Scaden, SCDC and CIBERSORTx(1). | Human SAT: 13<br><br>Human VAT: 15                           |
